# Supplementary material for: Revised Soil Classification System: Implementation and Engineering Implications
Source: Atypon-hosted journal article supplement (doi:10.1061/jggefk.gteng-10447), 2023-09-13
Supplement: supplemental_materials_jggefk.gteng-10447_castro.pdf [file supplemental_materials_jggefk.gteng-10447_castro.pdf]

## **SUPPLEMENTAL MATERIALS**

*ASCE Journal of Geotechnical and Geoenvironmental Engineering*

# Revised Soil Classification System: Implementation and Engineering Implications

Gloria M. Castro, Junghee Park, and J. Carlos Santamarina

**DOI:** 10.1061/JGGEFK.GTENG-10447

© ASCE 2023

[www.ascelibrary.org](http://www.ascelibrary.org)

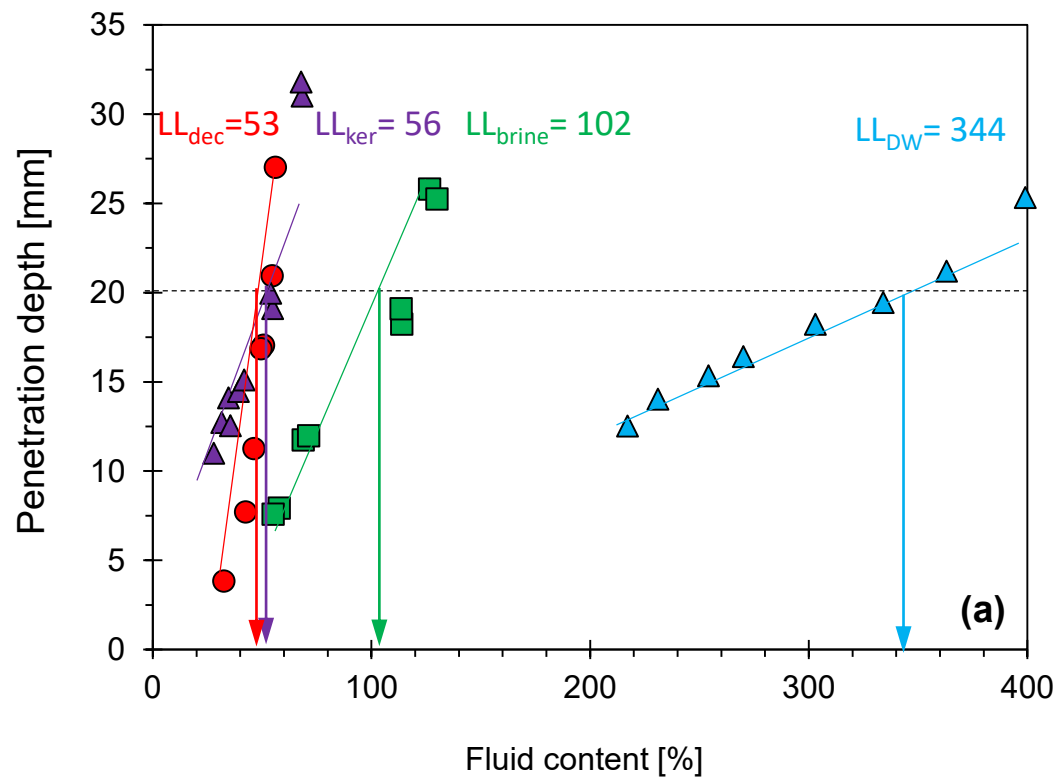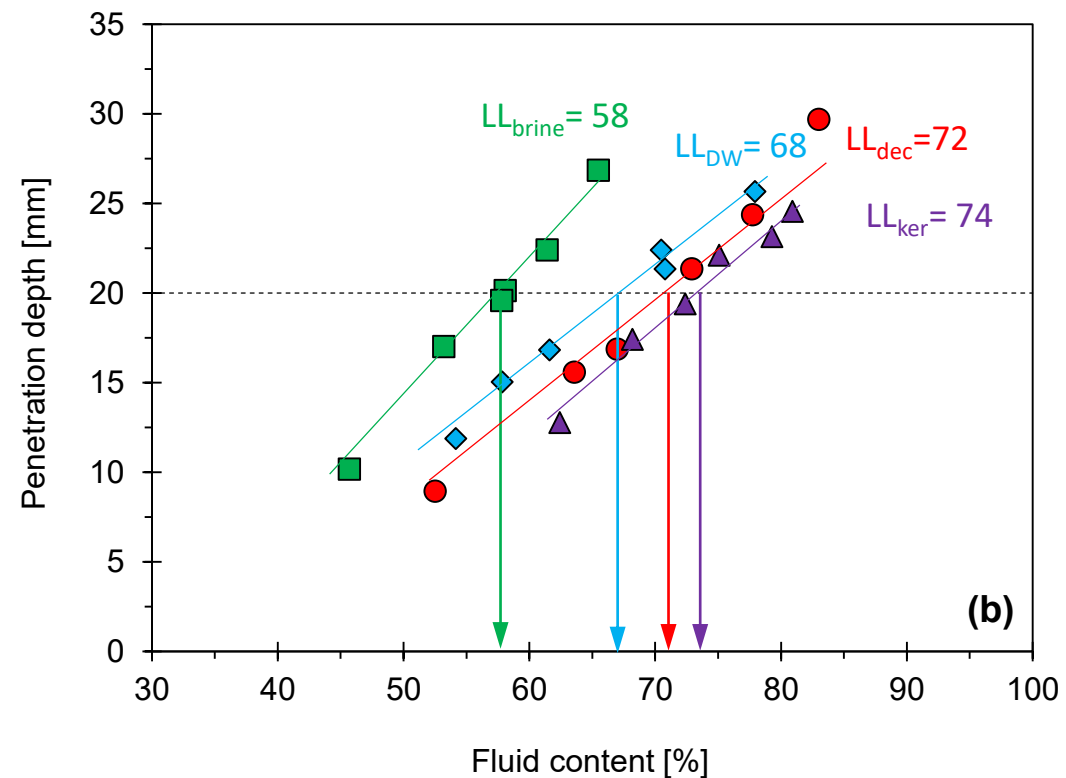

**Fig. S1.** Liquid limit with different fluids – Kerosene or decane? Data gathered with the cone method show that kerosene and decane produce similar results and either one can be used to represent non-polar fluids. (a) Bentonite and (b) Kaolinite.

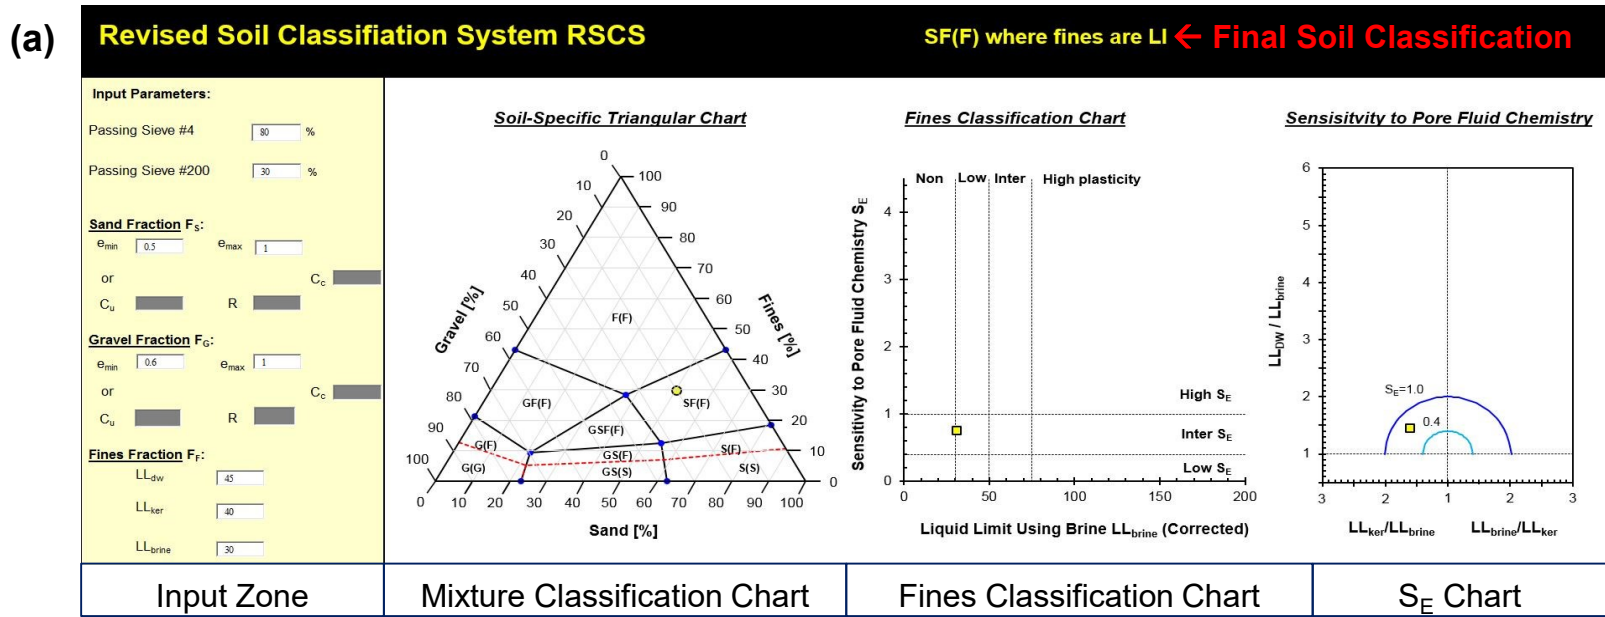

**(b)**

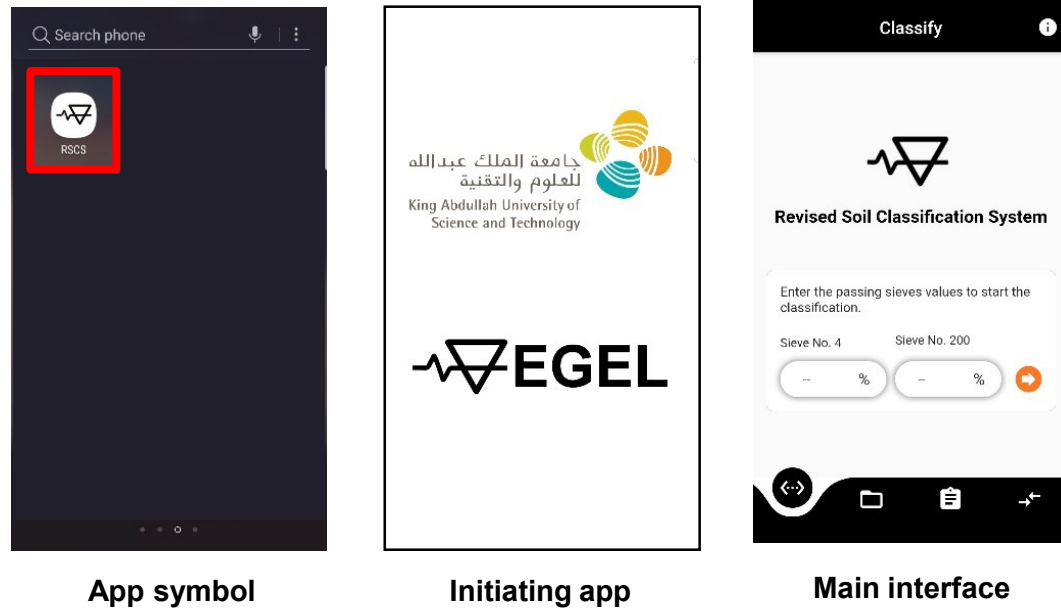

**Fig. S2.** RSCS implementation tools (a) Excel macro (reprinted from EGEL 2023); (b) Mobile application – available from the Android Play Store.

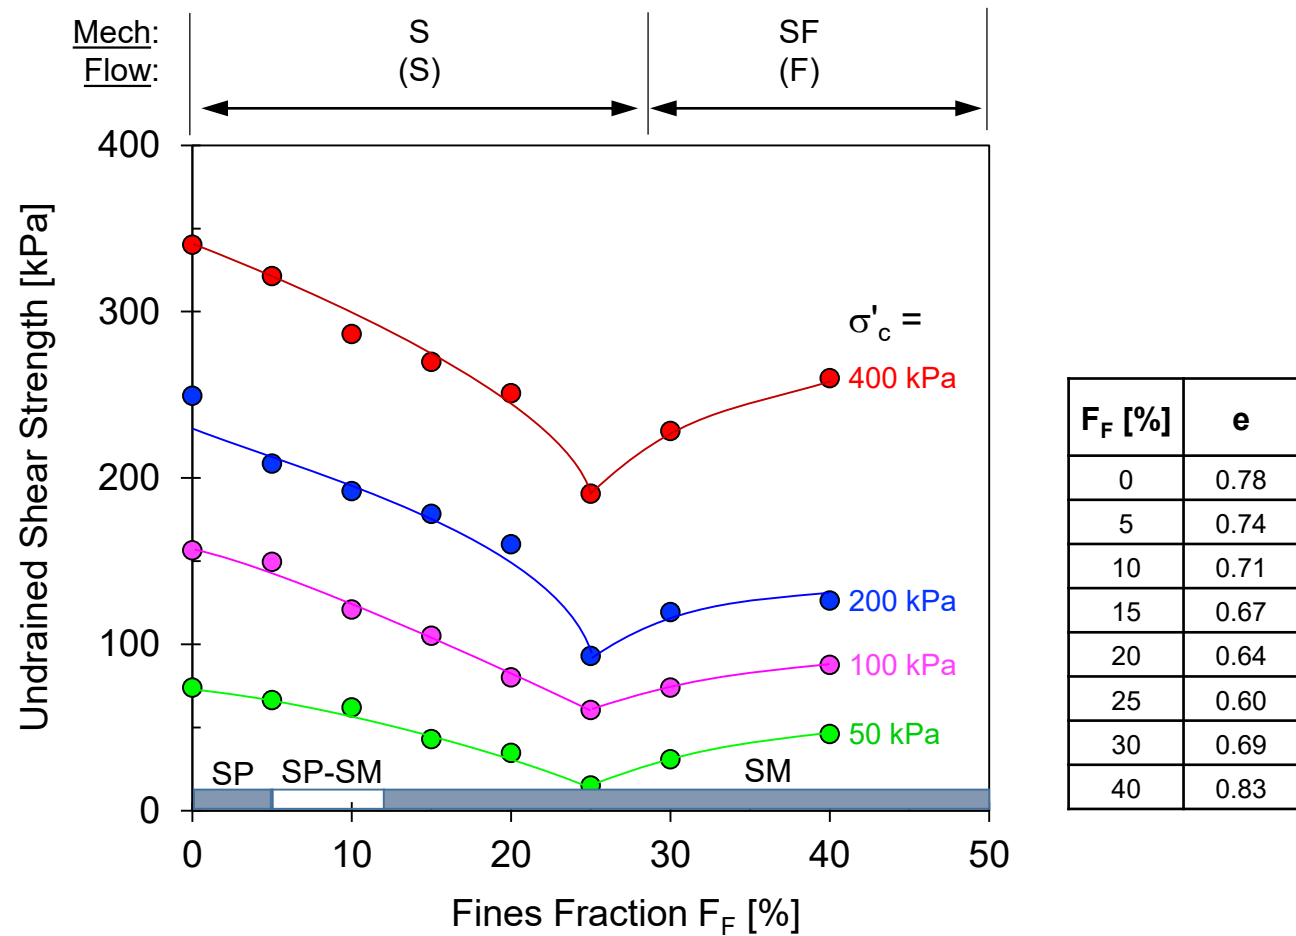

**Fig. S3.** Undrained shear strength of sand-kaolinite mixtures (sand: uniformly graded medium sand from a river in Johor Bahru, Malaysia,  $e_c^{\max} = 0.92$ ,  $e_c^{\min} = 0.65$ ; kaolinite: LL= 38 manufactured by Kaolin Sdn Bhd, Malaysia). Effective confining stress  $\sigma'_c$  during undrained shear are shown for each trend. The mixtures void ratios at  $\sigma'_o = 10$  kPa are tabulated on the right and the target initial relative density is  $D_r = 50\%$  in all cases. (Data from Marto et al. 2014.)

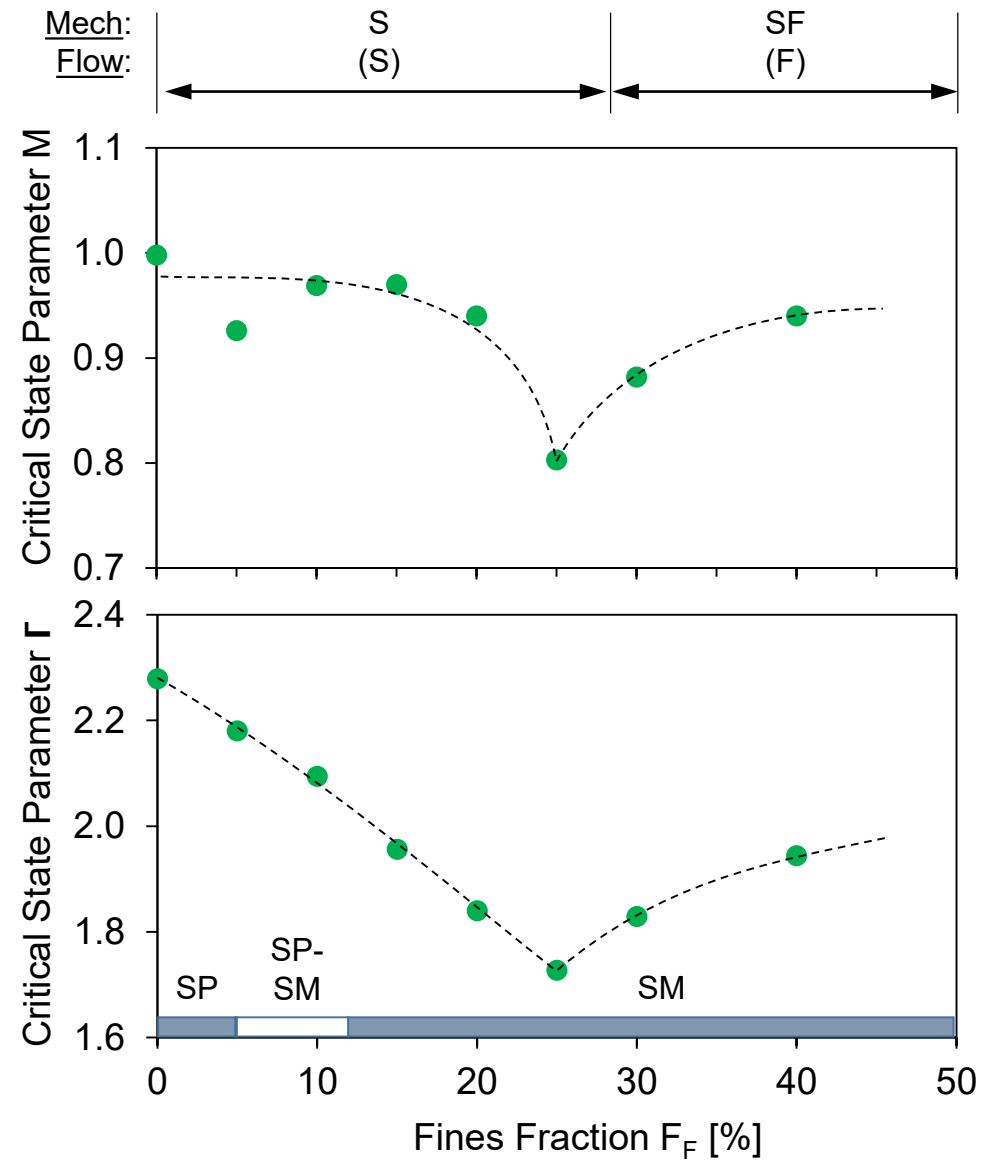

**Fig. S4.** Critical State Parameters. Sand-kaolinite mixtures. (sand: uniformly graded medium sand from a river in Johor Bahru, Malaysia,  $e_C^{\max}= 0.92$ ,  $e_C^{\min}= 0.65$ ; kaolinite: LL= 38 manufactured by Kaolin Sdn Bhd, Malaysia). (Data from Marto et al. 2014.)

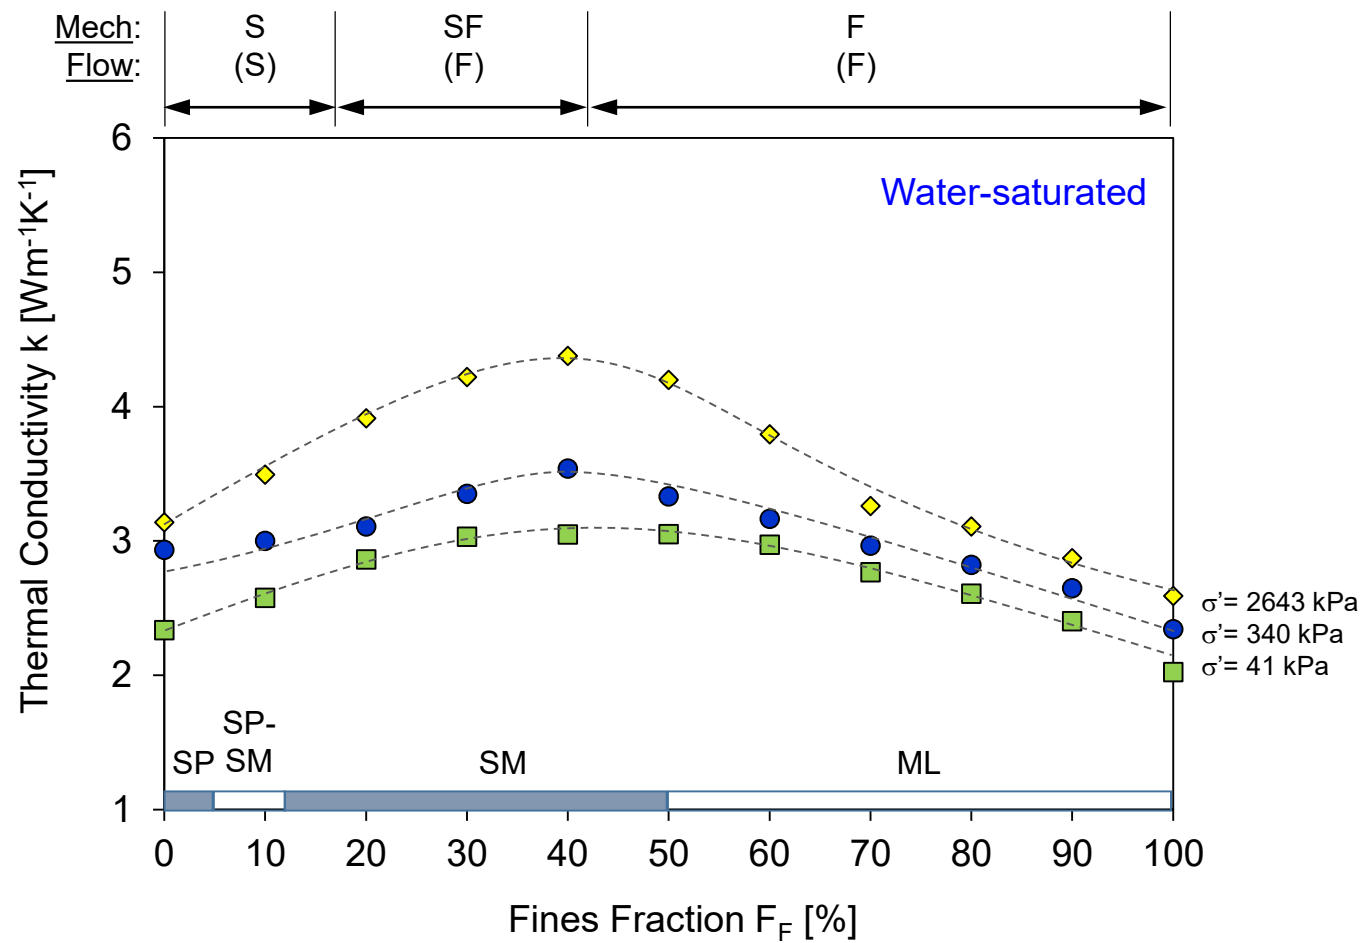

**Fig. S5.** Thermal conductivity. Sand-silt mixture. (sand:  $e_C^{\max} = 0.91$ ,  $e_C^{\min} = 0.58$ ; silt:  $e_F^{\max} = 1.81$ ,  $e_F^{\min} = 0.64$ ). (Data from Roshankhah et al. 2021.)

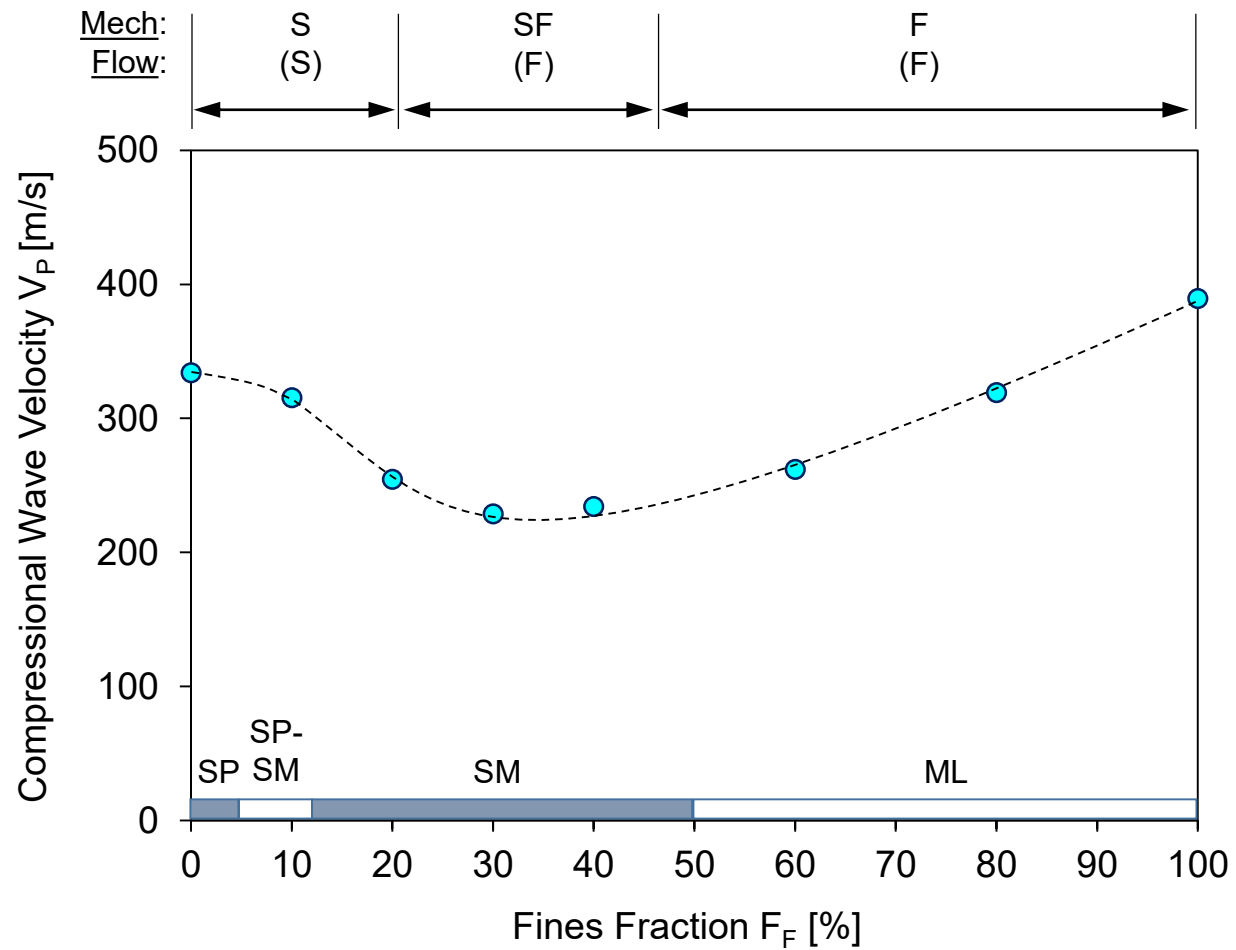

**Fig. S6.** Compressional wave velocity. Sand-silt mixture. (sand:  $e_C^{\max} = 1.02$ ,  $e_C^{\min} = 0.57$ ; silt:  $e_F^{\max} = 1.21$ ,  $e_F^{\min} = 0.50$ ). (Data from Kang and Lee 2015.)

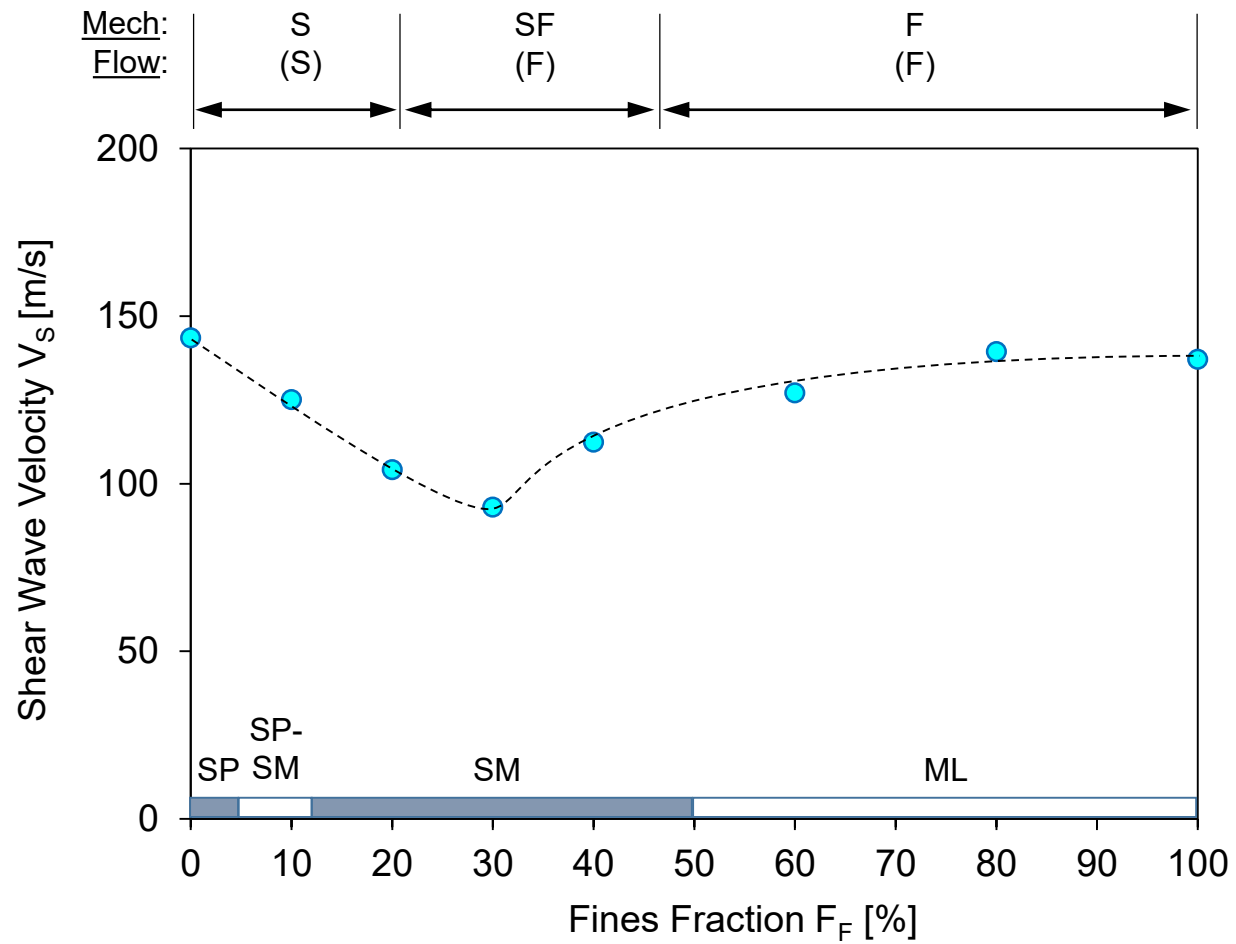

**Fig. S7.** Shear wave velocity: Small strain stiffness. Sand-silt mixture. (sand:  $e_C^{\max} = 1.02$ ,  $e_C^{\min} = 0.57$ ; silt:  $e_F^{\max} = 1.21$ ,  $e_F^{\min} = 0.50$ ). (Data from Kang and Lee 2015.)



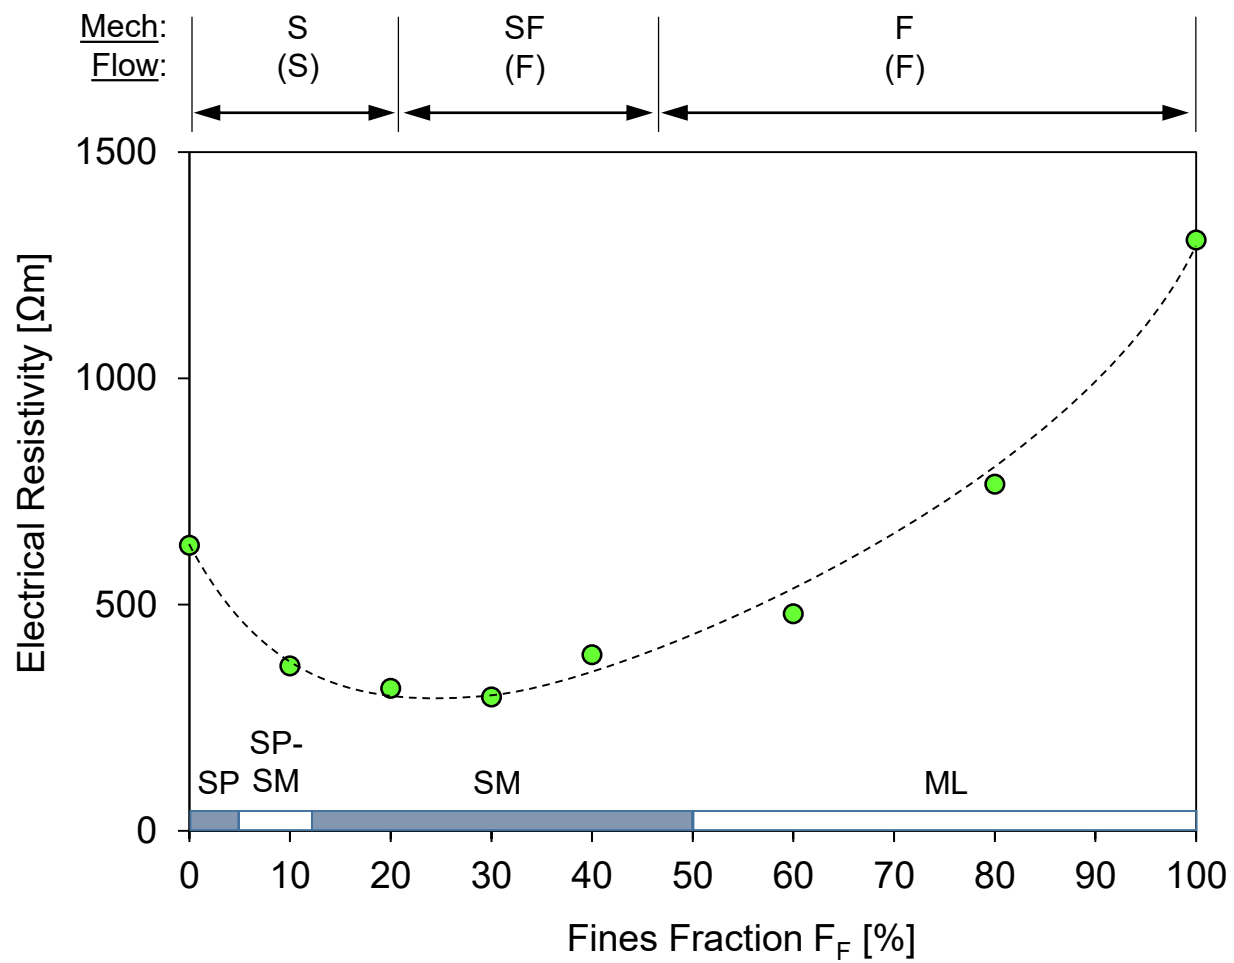

**Fig. S8.** Electrical Resistivity. Sand-silt mixture. (sand:  $e_C^{\max}= 1.02$ ,  $e_C^{\min}= 0.57$ ; silt:  $e_F^{\max}= 1.21$ ,  $e_F^{\min}= 0.50$ ). (Data from Kang and Lee 2015.)

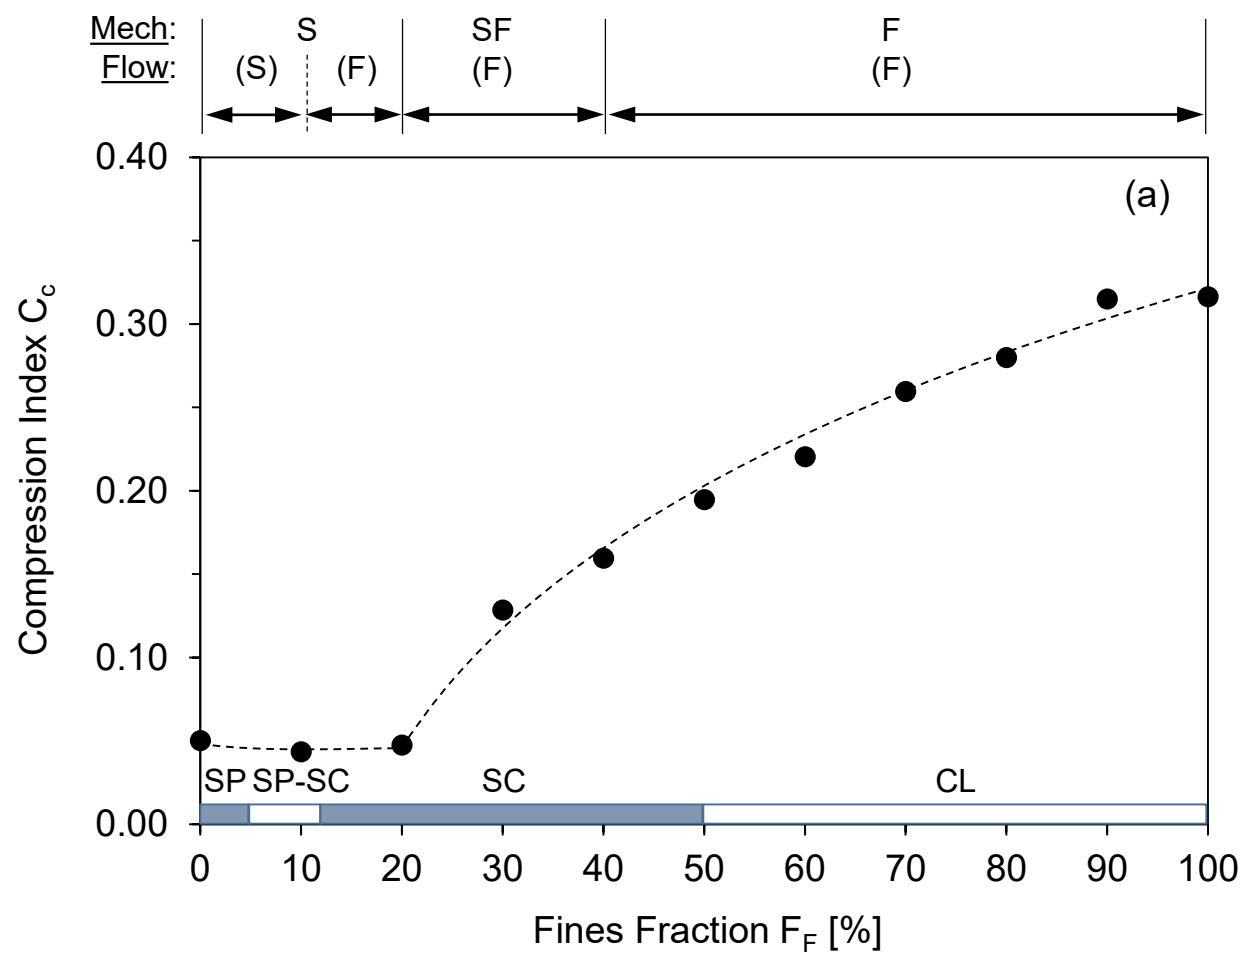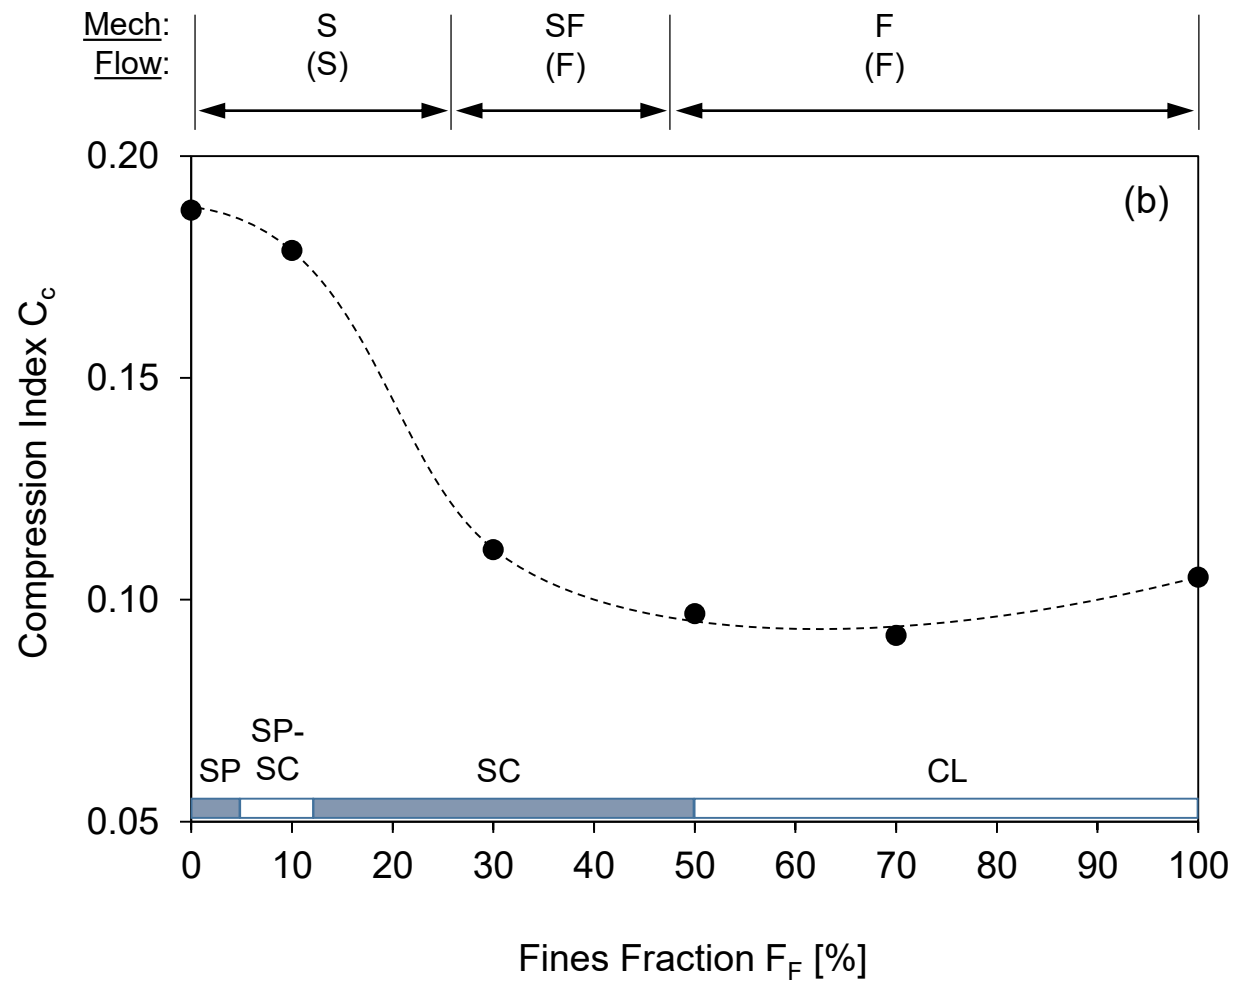

**Fig. S9.** Compressibility: Large strain. (a) Sand-clay mixture. (sand:  $e_C^{\max}=0.912$ ,  $e_C^{\min}=0.584$ ; clay:  $LL=49$ ) (data from Simpson and Evans 2015); (b) Sand-Silt mixture (sand:  $e_C^{\max}=1.068$ ,  $e_C^{\min}=0.615$ ; silt:  $LL=27$ ) (data from Carrera et al. 2011).

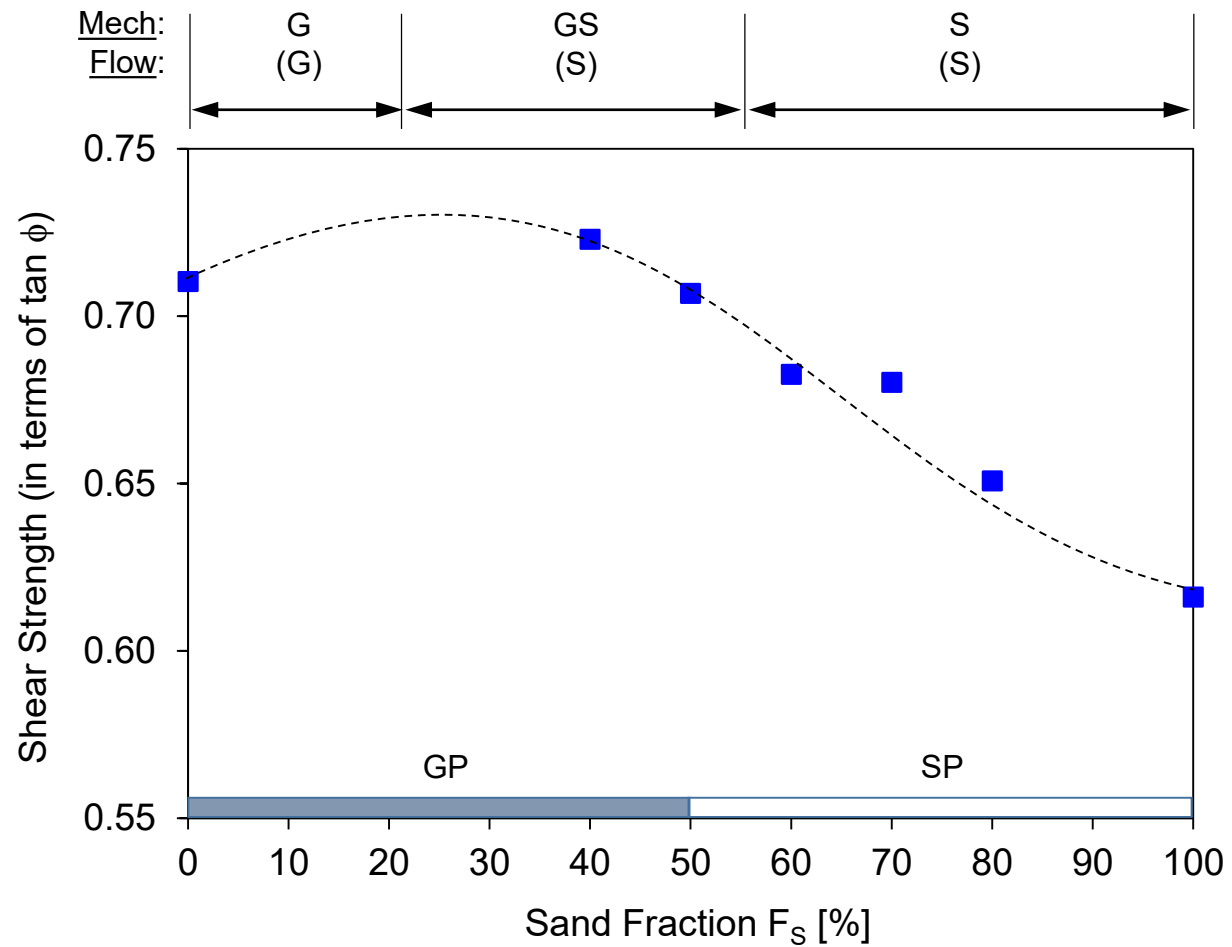

**Fig. S10.** Shear strength (in terms of  $\tan \phi$ ). Gravel-sand mixture. (gravel:  $e_C^{\max} = 0.68$ ,  $e_G^{\min} = 0.44$ ; sand:  $e_S^{\max} = 0.62$ ,  $e_S^{\min} = 0.38$ ). (Data from Simoni and Houlsby 2006.)

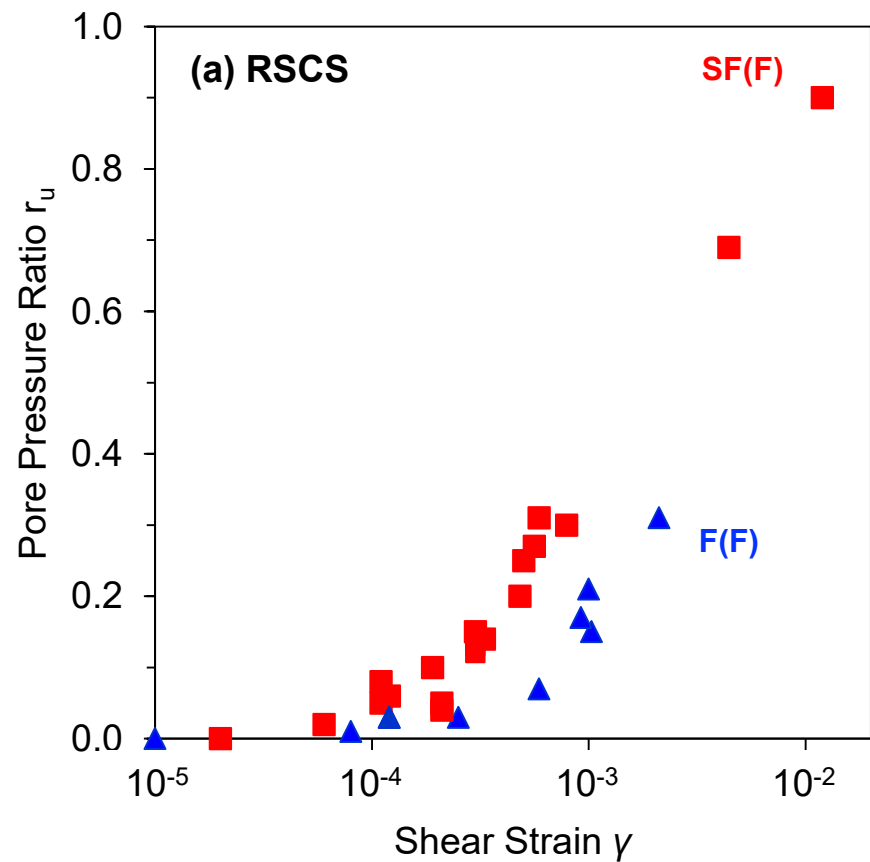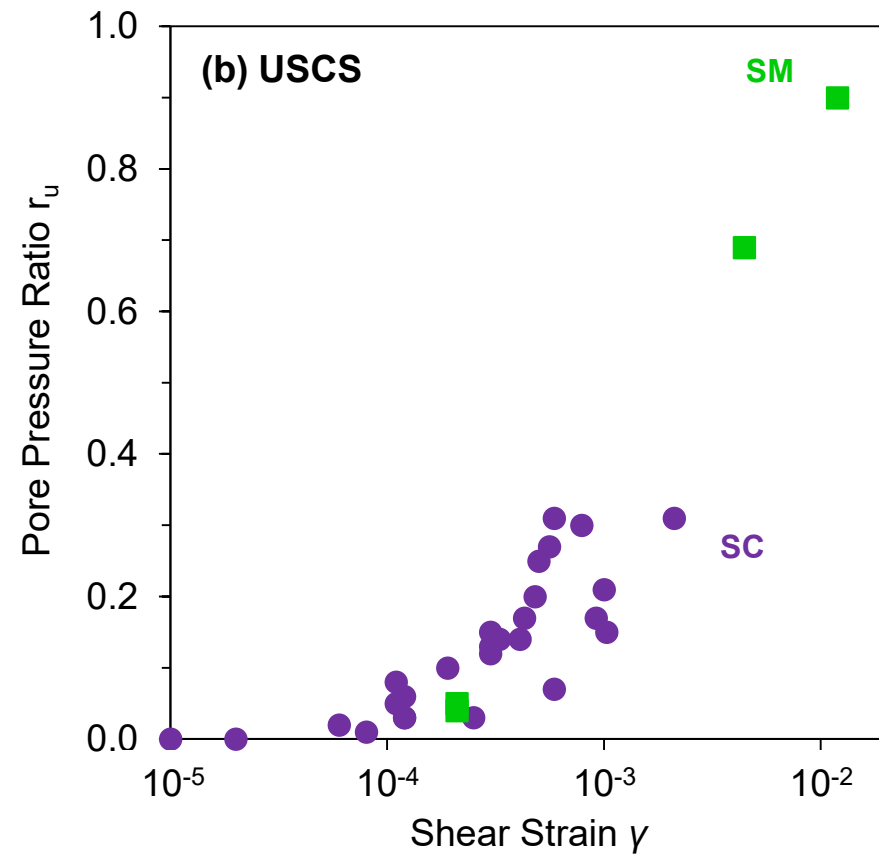

**Fig. S11.** Savannah River soil classification: Low amplitude cyclic loading tests. The pore pressure ratio is the ratio between the residual pore pressure and the initial confining stress  $r_u = \Delta u / \sigma'_c$  in undrained tests (In-Tank Precipitation facility). (Data from Law Engineering 1994.)

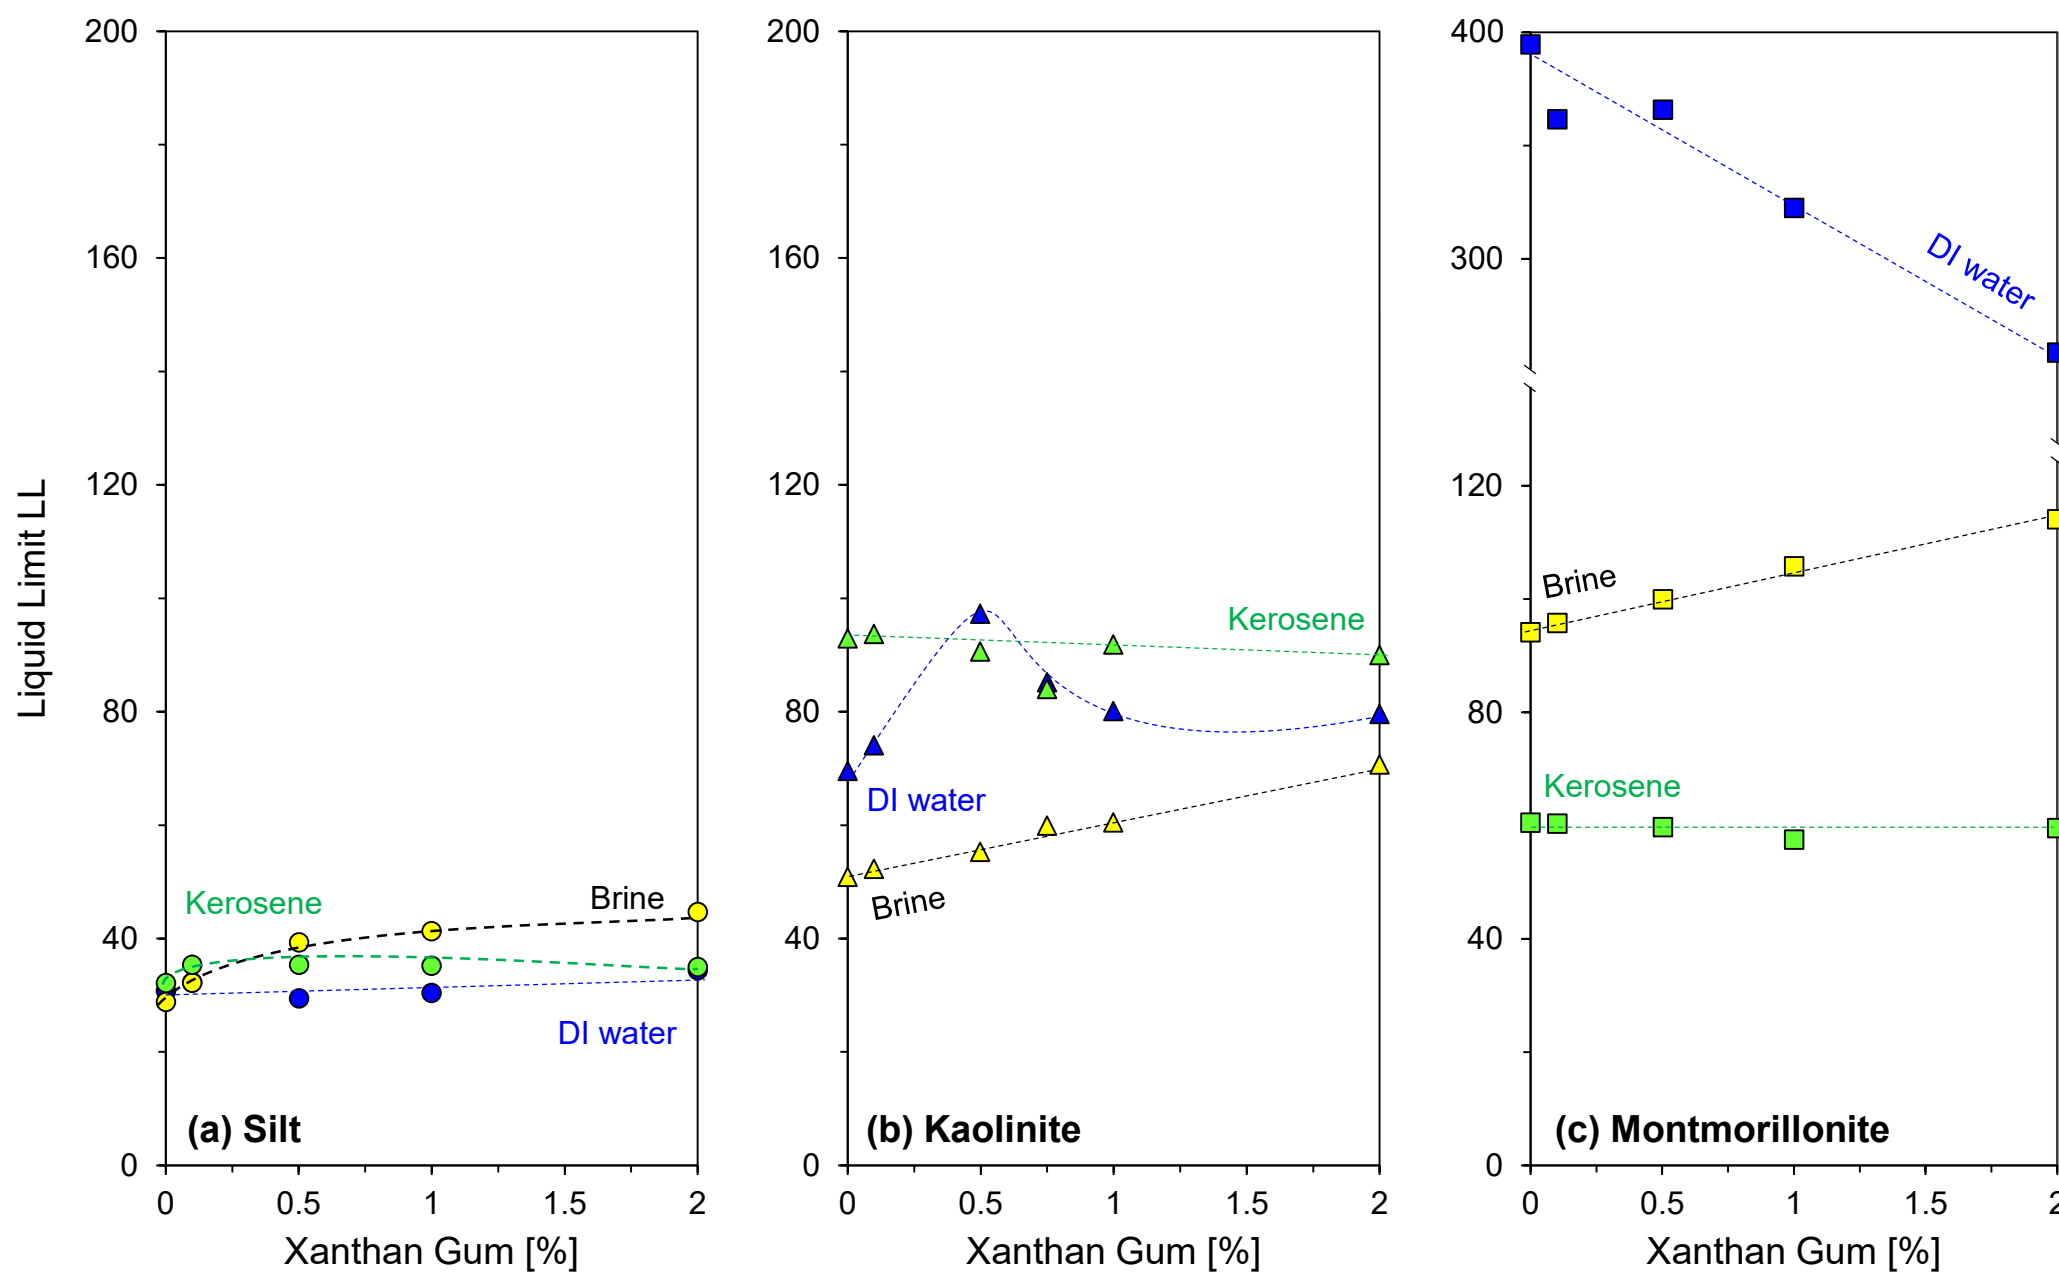

**Fig. S12.** Analysis of fines fraction response to changes in biopolymers content using different pore fluid chemistries based on the RSCS principles. (a) Silt; (b) Kaolinite; and (c) Montmorillonite. (Data from Chang et al. 2019.)

## **References**

- Carrera, A., Coop, M., and Lancellotta, R. (2011). "Influence of grading on the mechanical behavior of Stava tailings." *Géotechnique*, 61(11), 935-946.
- Chang, I., Kwon, Y. M., Im, J., and Cho, G. C. (2019). Soil consistency and interparticle characteristics of xanthan gum biopolymer-containing soils with pore-fluid variation. *Can. Geotech. J.* 56(8), 1206-1213.
- EGEL (Energy GeoEngineering Laboratory). 2023. "Revised soil classification system (RSCS)." (Reprinted from EGEL 2023). <https://egel.kaust.edu.sa/Pages/Tools-Procedures.aspx>
- Kang, M., and Lee, J. S. (2015). "Evaluation of the freezing–thawing effect in sand–silt mixtures using elastic waves and electrical resistivity." *Cold Reg. Sci. Technol.* 113, 1-11.
- Law Engineering (1994). "Final Report for ITP Geotechnical Services", Westinghouse Savannah River Company, U.S. Department of Energy, 325 pages.
- Marto, A., Tan, C. S., Makhtar, A. M., and Kung Leong, T. (2014). "Critical state of sand matrix soils." *The Scientific World J.*, 2014, 1-8.
- Roshankhah, S., Garcia, A. V., Santamarina, J. C. (2021). "Thermal conductivity of sand-silt mixtures." *J. Geotech. Geoenviron. Eng.* 10.1061/(ASCE)GT.1943-5606.0002425, 06020031.
- Simoni, A., and Houlsby, G. T. (2006). "The direct shear strength and dilatancy of sand–gravel mixtures." *Geotech. Geol. Eng.*, 24(3), 523-549.
- Simpson, D. C., and Evans, T. M. (2015). "Behavioral thresholds in mixtures of sand and kaolinite clay." *J. Geotech. Geoenviron. Eng.*, 10.1061/(ASCE)GT.1943-5606.0001391, 04015073.
